# Supplementary material for: Five Years of the KNIME Vernalis Cheminformatics Community Contribution
Source: PubMed Central journal article supplement — Curr Med Chem. 2020 Nov;27(38):6495–522. doi: 10.2174/0929867325666180904113616 (PMC8206202; doi:10.2174/0929867325666180904113616), 2020-11
Supplement: CMC-27-6495_SD1.pdf [file CMC-27-6495_SD1.pdf]

## Supplementary Materials

# Five Years of the KNIME Vernalis Cheminformatics Community Contribution

Stephen D. Roughley<sup>1,\*</sup>

<sup>1</sup>*Department of Chemistry & Cheminformatics, Vernalis Research Ltd, Granta Park, Great Abington, Cambridge CB21 6GB, UK*

Figure S1 – Growth of publicly available data (Larger version of Figure 1)

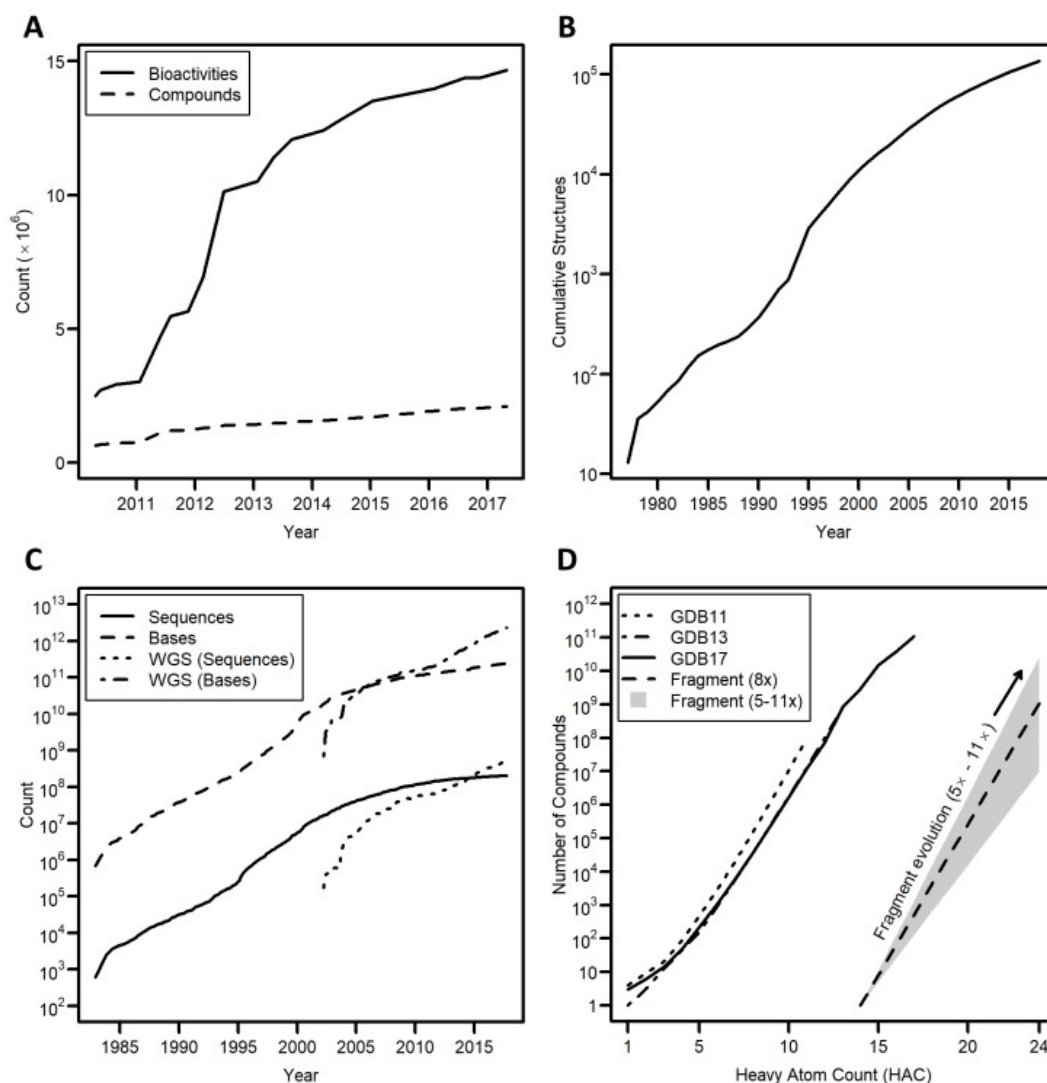

Data collated as follows:

A – ChEMBL – The data were compiled from the individual release files

'chembl\_XX\_release\_notes.txt' for each release at

<ftp://ftp.ebi.ac.uk/pub/databases/chembl/ChEMBLdb/releases/>, where 'XX' is the release number

B – RCSB PDB Structures – The data were downloaded from

<https://www.rcsb.org/pdb/statistics/contentGrowthChart.do?content=total&seqid=100>

C – NCBI GenBank – The data were downloaded from

<https://www.ncbi.nlm.nih.gov/genbank/statistics/>

D – GCB 11 / GDB 13 / GDB 17 – The data were compiled from the references cited in the main text

Figure S2. XML Queries for the simplified query views shown in Figure 6:

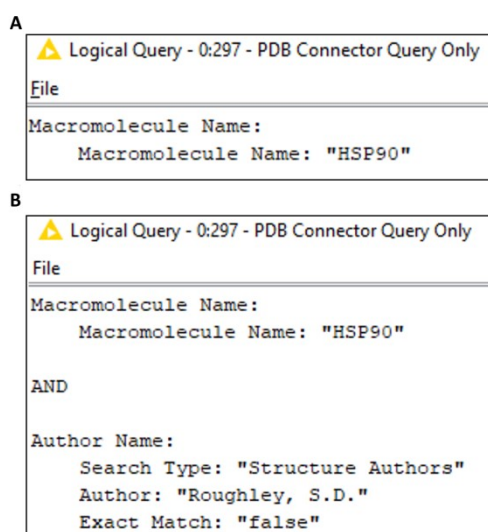

6A:

```
<orgPdbQuery>
  <queryType>org.pdb.query.simple.MoleculeNameQuery</queryType>
  <macromoleculeName>HSP90</macromoleculeName>
</orgPdbQuery>
```

6B:

```
<orgPdbCompositeQuery version="1.0">
  <queryRefinement>
    <queryRefinementLevel>0</queryRefinementLevel>
    <orgPdbQuery>
      <queryType>org.pdb.query.simple.MoleculeNameQuery</queryType>
      <macromoleculeName>HSP90</macromoleculeName>
    </orgPdbQuery>
  </queryRefinement>
  <queryRefinement>
    <queryRefinementLevel>1</queryRefinementLevel>
    <conjunctionType>and</conjunctionType>
    <orgPdbQuery>
      <queryType>org.pdb.query.simple.AdvancedAuthorQuery</queryType>
      <searchType>1</searchType>
      <audit_author.name>Roughley, S.D.</audit_author.name>
      <exactMatch>>false</exactMatch>
    </orgPdbQuery>
  </queryRefinement>
</orgPdbCompositeQuery>
```

Figure S3. SMARTSviewer representation of c1[n,o,s]c[c,n]c1

c1[n,o,s]c[c,n]c1

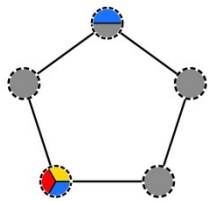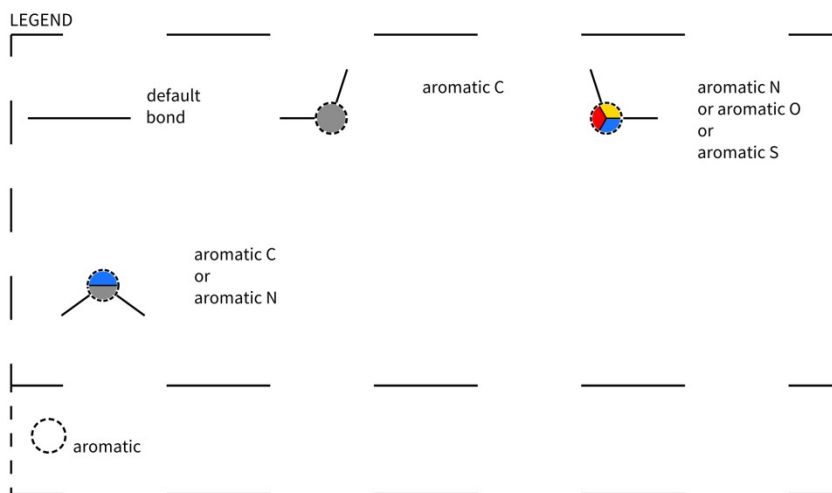

Picture created by the SMARTSviewer [smartsview.zbh.uni-hamburg.de].  
Copyright: ZBH - Center for Bioinformatics Hamburg.

Table S1 Structural Representations of SMILES in Table 3

| ID | SMILES                                                                              | Default                                                                            | 1 <sup>st</sup> Unique                                                             | Longest SMILES                                                                       |
|----|-------------------------------------------------------------------------------------|------------------------------------------------------------------------------------|------------------------------------------------------------------------------------|--------------------------------------------------------------------------------------|
| 1  | <chem>C[N+](C)(C)C.CCC(=O)[O-]</chem>                                               | <chem>C[N+](C)(C)C, CCC(=O)[O-]</chem>                                             | <chem>C[N+](C)(C)C</chem>                                                          | <chem>C[N+](C)(C)C</chem>                                                            |
|    | 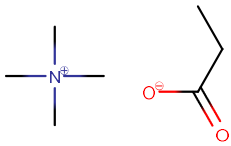   |   |   |   |
| 2  | <chem>C[N+](C)(C)CCCC.C[N+](C)(C)CCCC.[O-]C(=O)CCC(=O)[O-]</chem>                   | <chem>C[N+](C)(C)CCCC, [O-]C(=O)CCC(=O)[O-]</chem>                                 | <chem>C[N+](C)(C)CCCC</chem>                                                       | <chem>[O-]C(=O)CCC(=O)[O-]</chem>                                                    |
|    |   |  |  |  |
| 3  | <chem>C1C.CC1</chem>                                                                | <chem>C1C<sup>a</sup>, CC1<sup>a</sup></chem>                                      | <chem>C1C<sup>a</sup></chem>                                                       | <chem>C1C<sup>a</sup></chem>                                                         |
|    |  |                                                                                    |                                                                                    |                                                                                      |

Figure S4 – Rendering of MMP Fragmentation

| S ID         | SMI Canonical SMILES                                                              | SMI Fragmentation 'Key' (Up...                                                    | SMI Fragmentation 'Value'                                                         | Fragmentation Depiction                                                             |
|--------------|-----------------------------------------------------------------------------------|-----------------------------------------------------------------------------------|-----------------------------------------------------------------------------------|-------------------------------------------------------------------------------------|
| CHEMBL277502 | 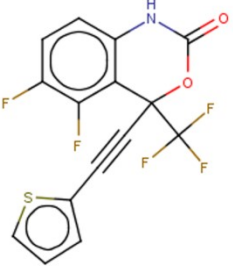 |  |  |  |

Rendering Key – Green – 'Value', Cyan – 'Key', Red – Cut bond(s). The colour scheme can be changed in the node settings.
